# Supplementary material
Source: HighWire-hosted journal article supplement (https://bmjopen.bmj.com/content/12/5/e062313)
Supplement: inline-supplementary-material-1 [file inline-supplementary-material-1.pdf]

## Draft Search Strategy for ‘Out-of-hospital births and the experiences of emergency ambulance clinicians and birthing parents: A scoping review protocol’.

### Initial search

Databases to be reviewed for initial search:

#### **MEDLINE via EBSCOhost**

Initial keywords:

*(“emergency birth” OR “unplanned birth” OR “born before arrival” OR BBA OR “home birth”*

*OR childbirth OR parturition OR labo\*r OR perinatal OR postpartum OR birth)*

*AND*

*(“out of hospital” OR “out-of-hospital” OR OOH OR prehospital OR pre-hospital OR*

*“emergency medical service\*” OR EMS OR ambulance OR paramedic\* OR “emergency medical technician\*”)*

Search options:

Advanced search: Title (TI), Abstract (AB), Subjects (SU)

Boolean/Phrase; apply equivalent subjects

Limits:

Scholarly (peer-reviewed) journals

Full Text

English language

**CINAHL Plus with Full Text**

Initial keywords:

*("emergency birth" OR "unplanned birth" OR "born before arrival" OR BBA OR "home birth"*

*OR childbirth OR parturition OR labo\*r OR perinatal OR postpartum OR birth)*

AND

*("out of hospital" OR "out-of-hospital" OR OOH OR prehospital OR pre-hospital OR*

*"emergency medical service\*" OR EMS OR ambulance OR paramedic\* OR "emergency medical*

*technician\*")*

Search options:

Advanced search: Title (TI), Abstract (AB), Subjects (SU)

Boolean/Phrase; apply equivalent subjects

Limits:

Peer-reviewed

Exclude MEDLINE (as this database is searched independently)

Full Text

English language

Human only

Located articles from MEDLINE and CINAHL will be analysed for text words utilised in Title, Abstract and identifying index terms.

### Subsequent search:

Text, keywords, or index words identified by the initial search and those suggested by Reviewer Two will be included here. For example:

*("births before arrival" OR deliver\* OR "accidental ± deliver\*" OR "accidental ± birth\*" OR "out-of-institution deliver\*" OR "out-of-institution birth\*" OR "emergency birth" OR "unplanned birth" OR "born before arrival" OR BBA OR "home birth\*" OR childbirth OR parturition OR labo\*r OR perinatal OR postpartum OR birth)*

AND

*("out of hospital" OR "out-of-hospital" OR prehospital OR pre-hospital OR "emergency medical service\*" OR EMS OR ambulance OR paramedic\* OR "emergency medical technician\*")*

### **MEDLINE via EBSCO**

Search options:

Advanced search: Title (TI), Abstract (AB), Subjects (SU)

Boolean/Phrase; apply equivalent subjects

Limits:

Scholarly (peer-reviewed) journals

Full Text

English language

### **CINAHL Plus with Full Text**

Search options:

Advanced search: Title (TI), Abstract (AB), Subjects (SU)

Boolean/Phrase; apply equivalent subjects

Limits:

Peer-reviewed

Exclude MEDLINE (as this database is searched independently)

Full Text

English language

Human only

### ***Embase***

Search options:

Advanced search: Title, Abstract, Author Keywords (:ti,ab,kw)

Limits:

Only in English

Humans only

Sources: Embase and Preprints

### ***Web of Science***

Search options:

Web of Science Core Collection

Advanced search: Topic (includes title, abstract, author keywords, and Keywords Plus)

Limits:

Editions: unselect

- Conference Proceedings Citation Index – Science (CPCI-S) – 1990-present;
- Conference Proceedings Citation Index – Social Science & Humanities (CPCI-SSH) – 1990-present;
- Current Chemical Reactions (CCR – EXPANDED) – 1985-present;
- Index Chemicus (IC) – 1993-present

Select

- Science Citation Index Expanded (SCI\_EXPANDED) – 1980-present
- Social Sciences Citation Index (SSCI) – 1980-present
- Arts & Humanities Citation Index (AHCI) – 1980-present
- Emerging Sources Citation Index (ESCI) – 2005-present

### **Wiley Online**

Search options:

Advanced search: Title, Abstract, Keywords

Limits:

Published in: Journals and reference works (remove conferences)
